# Supplementary material
Source: PubMed Central journal article supplement (PMC2531291)
Supplement: NIHMS61910-supplement-File001.pdf [file NIHMS61910-supplement-File001.pdf]

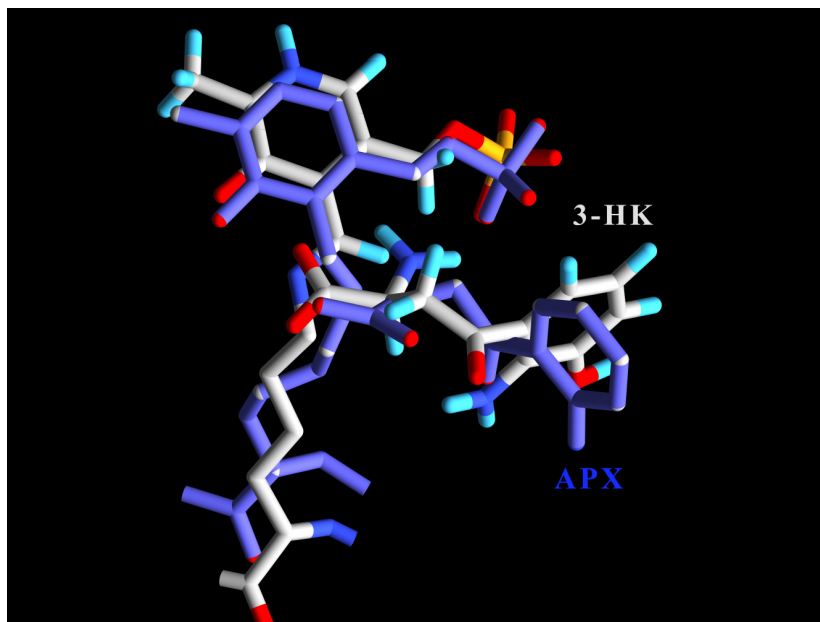

**Supplementary Material.** Structural superposition of the docked 3-hydroxy-L-kynurenine-Hkyn (3-HK) (bonds and label colored white, with CPK colored atoms) with 3-hydroxykynurenine transaminase complexed with 4-(2-aminophenyl)-4-oxobutanoic acid (APX) (bonds and label colored blue, with atoms colored CPK).
